# Supplementary material
Source: Springer Nature journal article supplement (https://www.springermedizin.de/resource/supplementary/12967_2011_946_MOESM6_ESM.pdf/9577208)

**TRANSFUSED  
NY-ESO-1 TCR****A**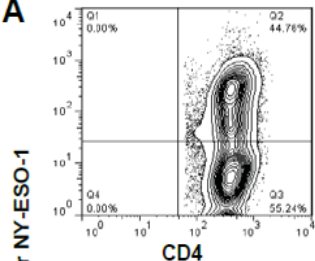**Tetramer NY-ESO-1****UNTRANSFUSED**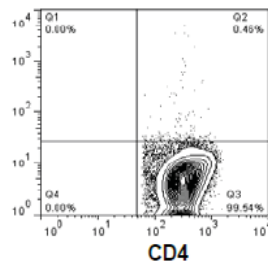**Gated from  
CD3<sup>+</sup>CD4<sup>+</sup>  
population**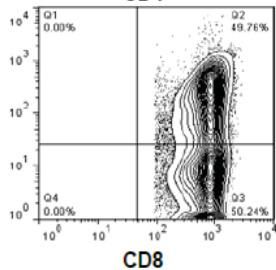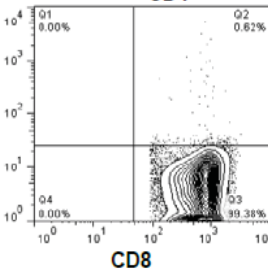**Gated from  
CD3<sup>+</sup>CD8<sup>+</sup>  
population****B**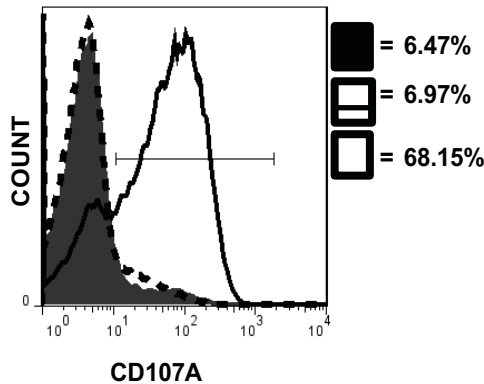

Supplement: MOESM6 [file 9577208]
